# Supplementary material for: Revealing the thermal sensitivity of lignin during glycerol thermal processing through structural analysis
Source: Royal Society of Chemistry journal article supplement (doi:10.1039/c6ra00745g), 2016-01-01
Supplement: c6ra00745g1.pdf [file c6ra00745g1.pdf]

# Revealing the thermal sensitivity of lignin during glycerol thermal processing through structural analysis

Wei Zhang<sup>a</sup>, Noppadon Sathitsuksanoh<sup>bc</sup>, Blake A. Simmons<sup>cd</sup>, Charles E. Frazier<sup>a</sup>, Justin Barone<sup>e</sup>, and Scott Renneckar<sup>\*af</sup>

<sup>a</sup> Macromolecules and Interfaces Institute and Department of Sustainable Biomaterials, Virginia Polytechnic Institute and State University, Blacksburg, VA, 24061, United States

<sup>b</sup> Department of Chemical Engineering and Conn Center for Renewable Energy Research, University of Louisville, Louisville, Kentucky 40292, USA

<sup>c</sup> Deconstruction Division, Joint BioEnergy Institute, Lawrence Berkeley National Laboratory, Emeryville, CA, 94608

<sup>d</sup> Biological and Engineering Sciences Center, Sandia National Laboratories, Livermore, CA, 94551

<sup>e</sup> Macromolecules and Interfaces Institute and Department of Biological Systems Engineering, Virginia Polytechnic Institute and State University, Blacksburg, 24061, United States

<sup>f</sup> Department of Wood Science, University of British Columbia, Forest Sciences Centre 4034, 2424 Main Mall, Vancouver, British Columbia V6T 1Z4, Canada. E-mail:

scott.renneckar@ubc.ca; Tel: 604-827-0637

Supporting information

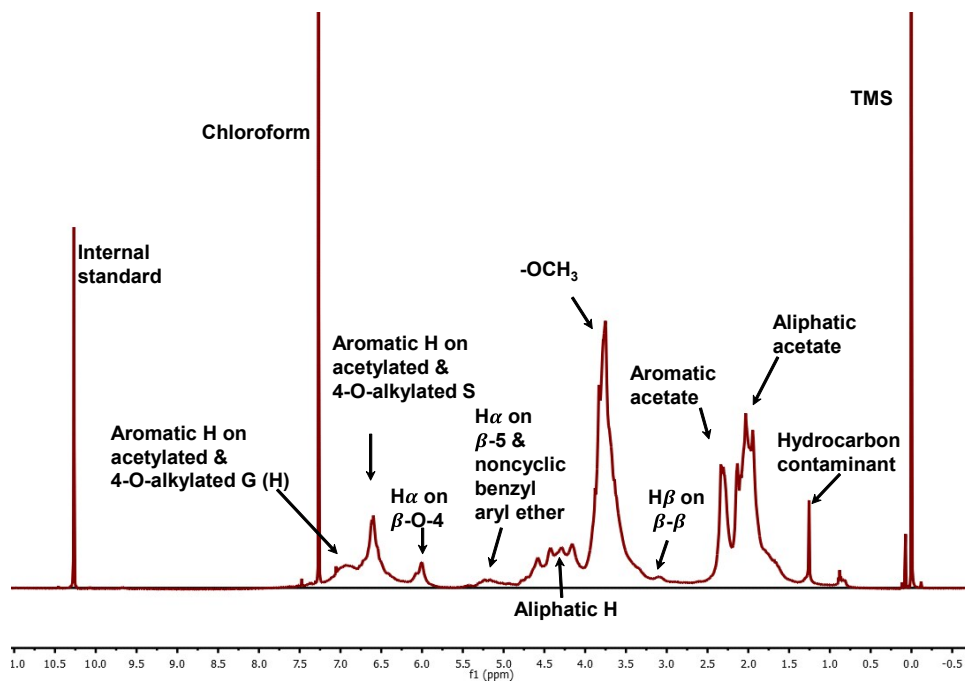

Figure S1. Quantitative <sup>1</sup>H-NMR spectra of GTP lignin with peak assignments.

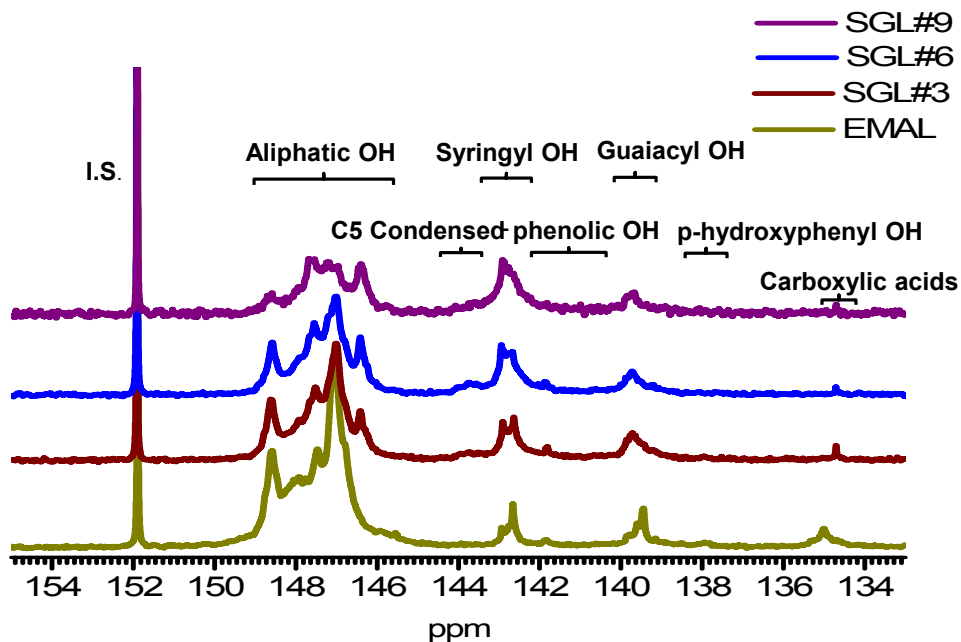

Figure S2. Quantitative <sup>31</sup>P-NMR spectra with peak assignments of EMAL and GTP lignin as a function of  $\log(R_0)$ .

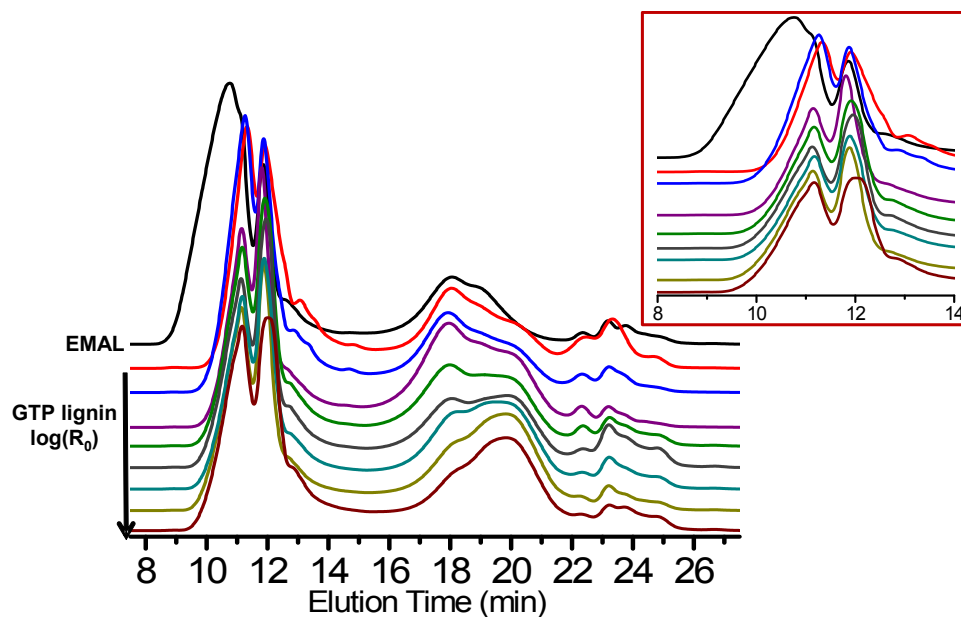

Figure S3. SEC elution curves of EMAL and GTP lignin as a function of  $\log(R_0)$  (UV detector at a wavelength of 290 nm).

Table S1. C9 formula of EMAL and GTP lignin.

| $\log(R_0)$ | Molecular Formula of C9             | MW of C9 (g/mol) |
|-------------|-------------------------------------|------------------|
| EMAL        | $C_9H_{7.63}O_{3.03}(OCH_3)_{1.87}$ | 222.1            |
| 4.14        | $C_9H_{7.04}O_{2.40}(OCH_3)_{1.85}$ | 210.7            |
| 4.44        | $C_9H_{6.79}O_{2.41}(OCH_3)_{1.85}$ | 210.7            |
| 4.61        | $C_9H_{6.66}O_{2.27}(OCH_3)_{1.82}$ | 207.6            |
| 4.72        | $C_9H_{6.51}O_{2.30}(OCH_3)_{1.76}$ | 205.8            |
| 5.03        | $C_9H_{6.48}O_{2.15}(OCH_3)_{1.74}$ | 203.0            |
| 5.2         | $C_9H_{6.51}O_{2.11}(OCH_3)_{1.74}$ | 202.2            |

\*Molecular formula and molecular weights of C9 were determined using the average of duplicates from results of elemental analysis (COV<0.2%) and  $^1H$ -NMR (COV<10%). Protein content <2% (w%) for GTP isolated lignin, and 5.7% (w%) for EMAL, ignored in the formula.

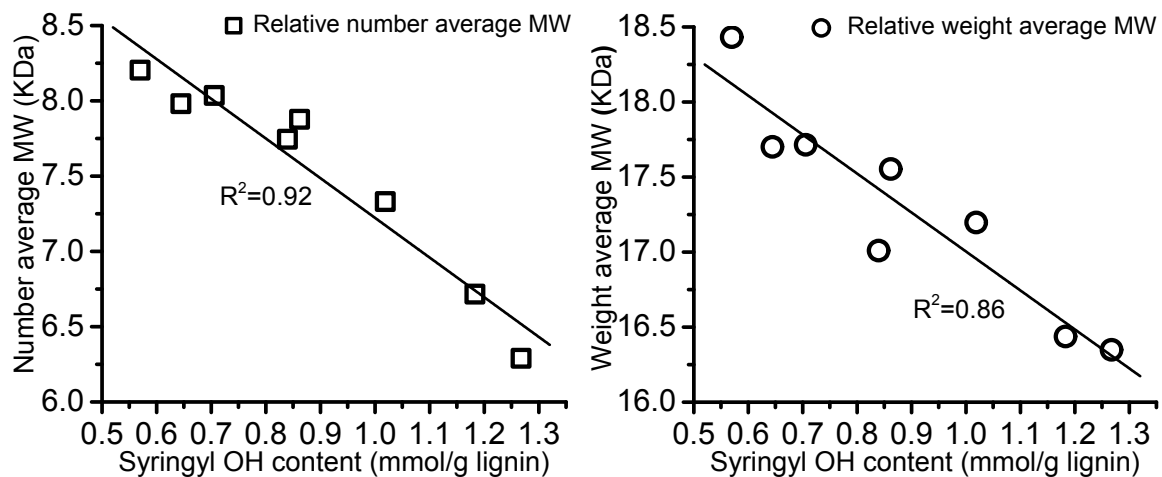

Figure S4. Correlations between molecular weight characteristics and free syringyl hydroxyl groups.

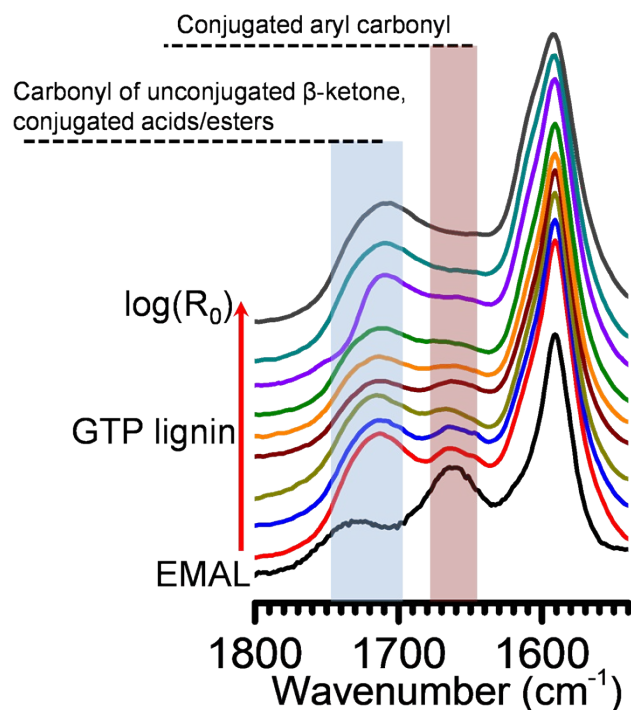

Figure S5. FTIR (1800-1540  $\text{cm}^{-1}$ ) of EMAL and GTP lignin as a function of  $\log(R_0)$ .

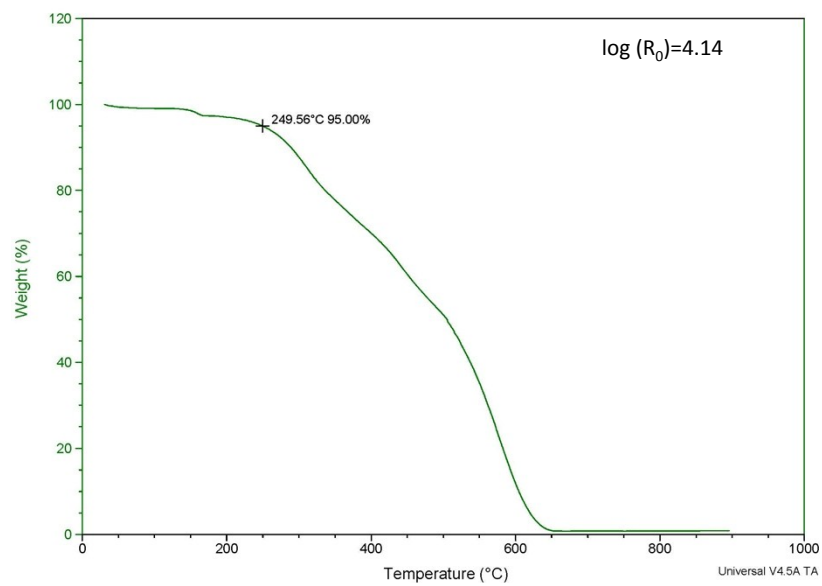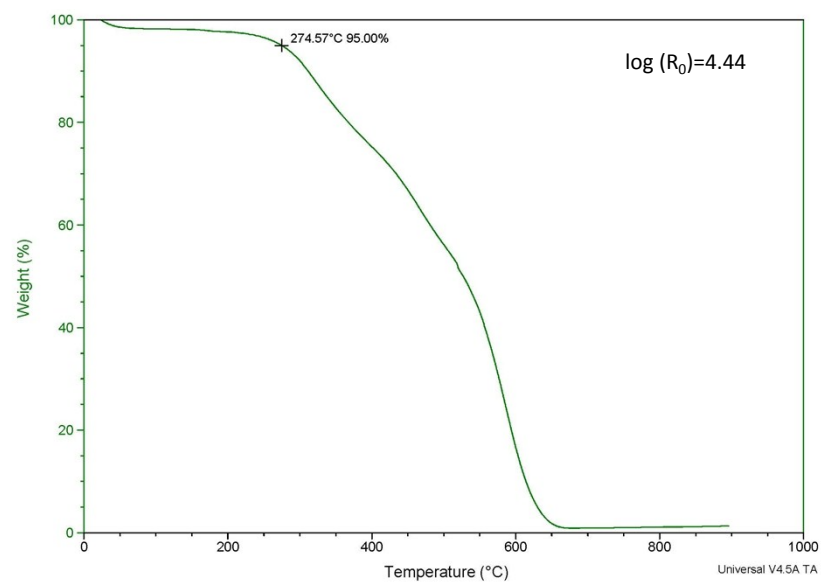

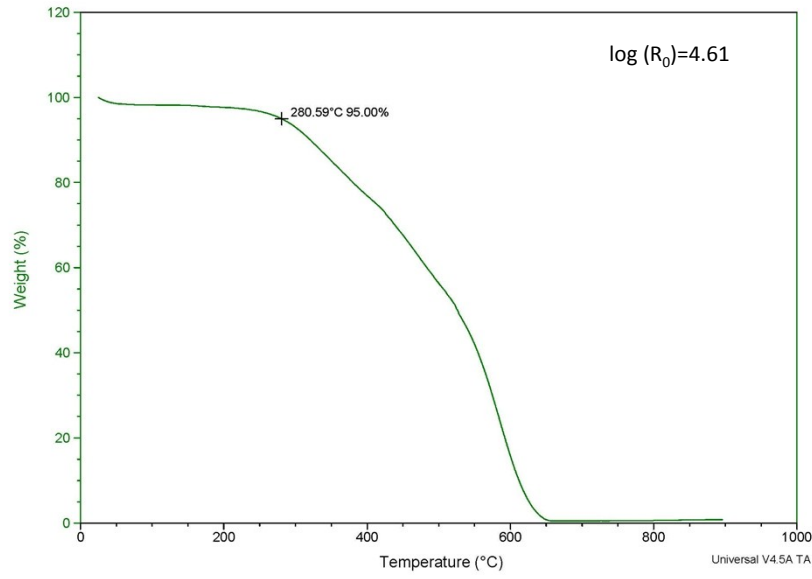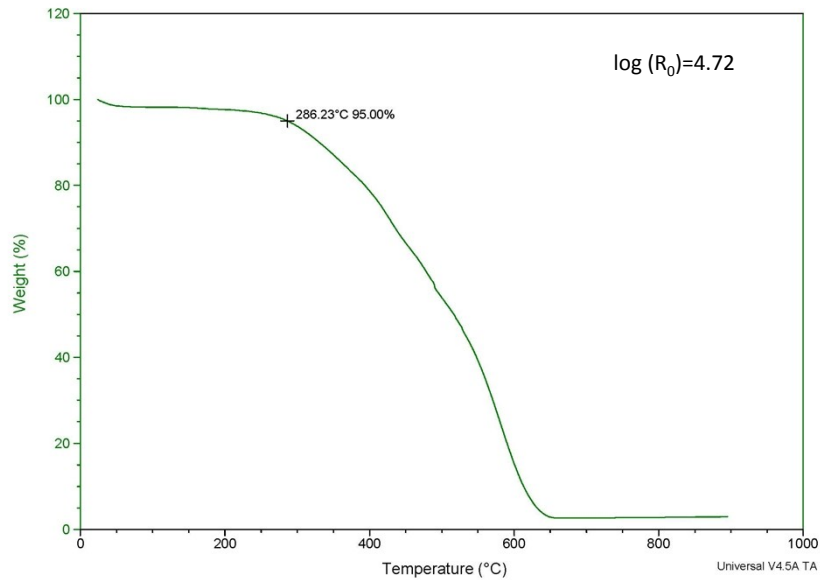

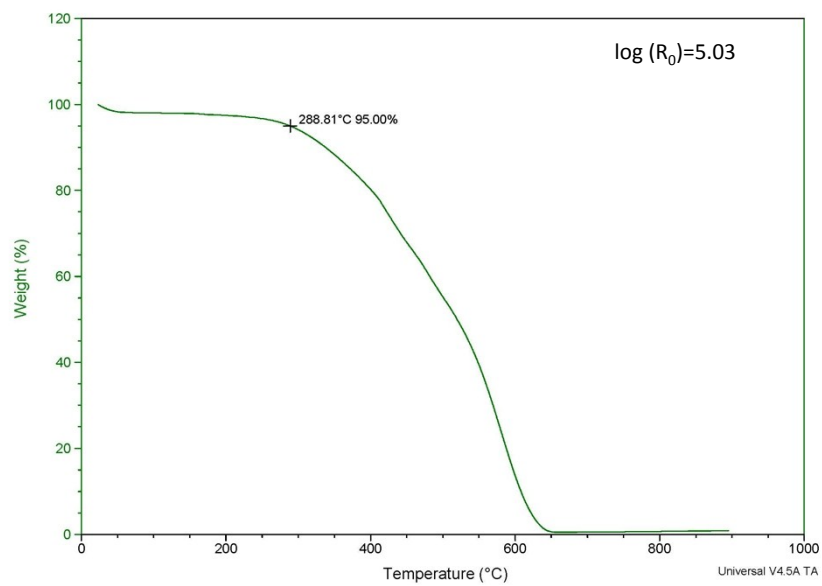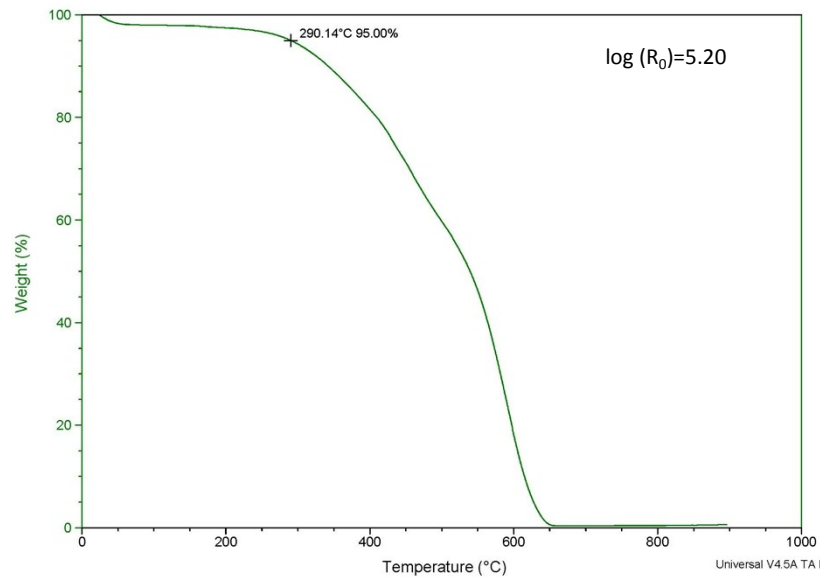

Figure S6. Represented TGA plots of GTP lignin with severity parameter listed for each lignin testes.

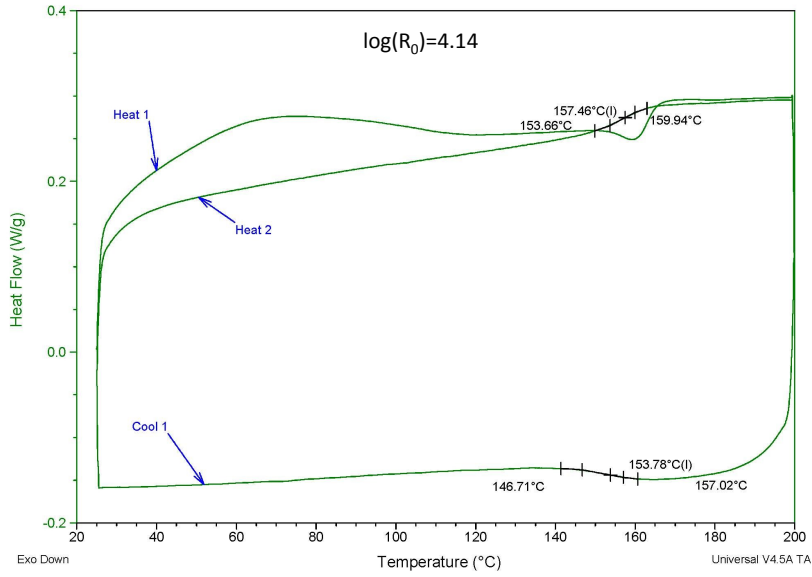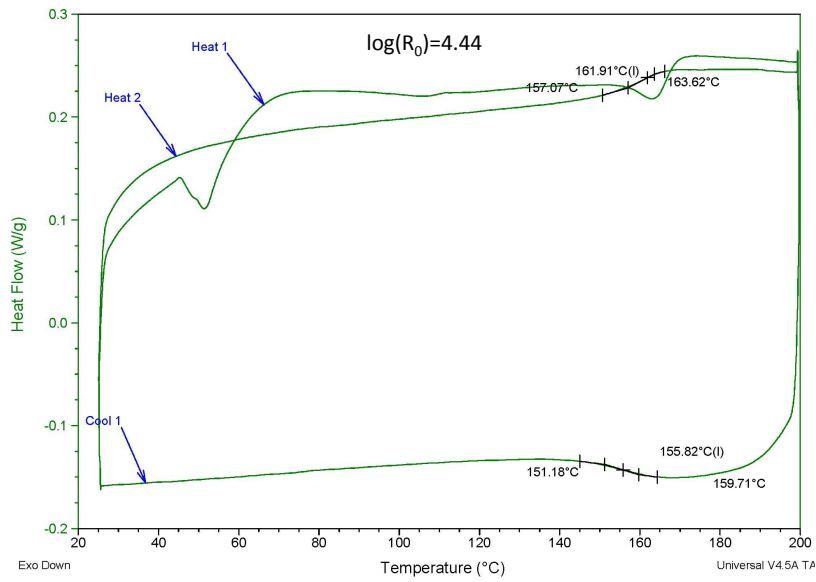



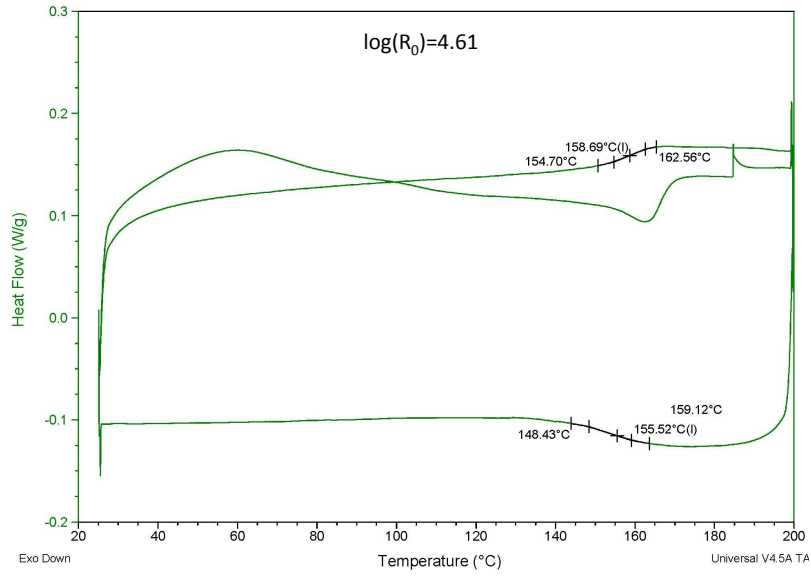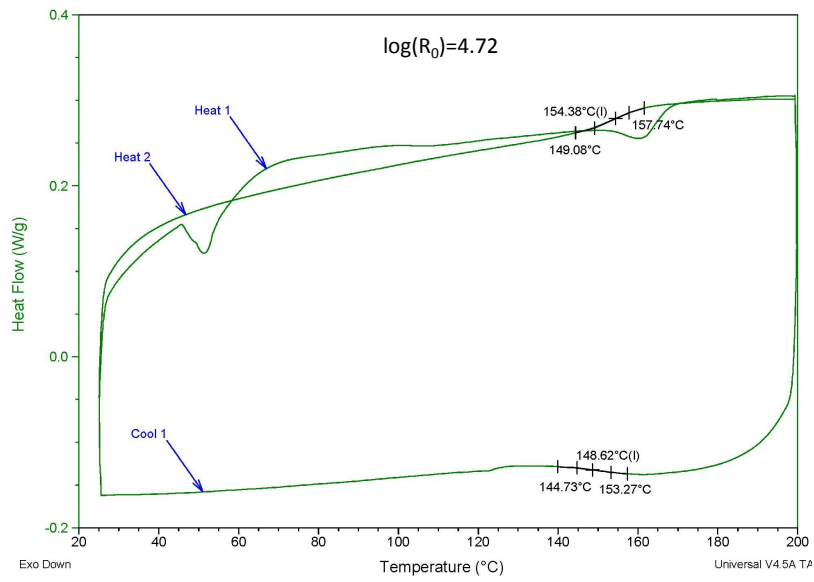

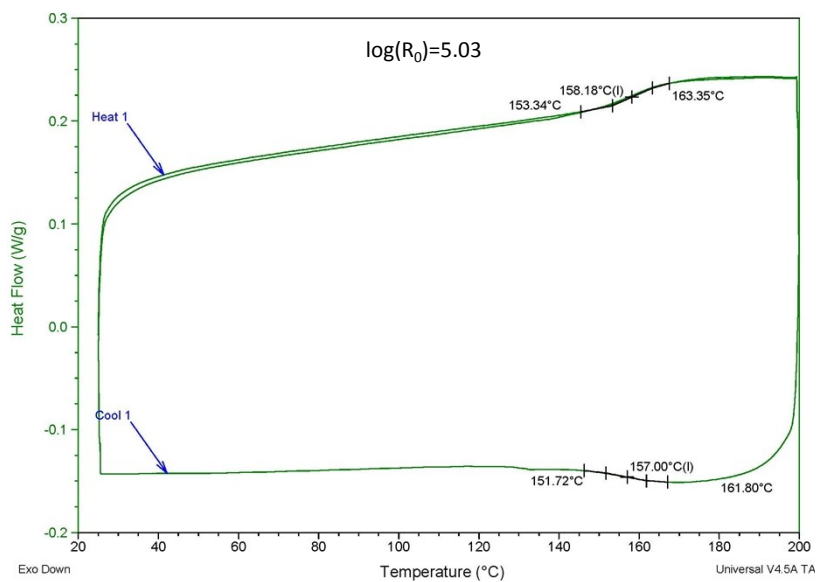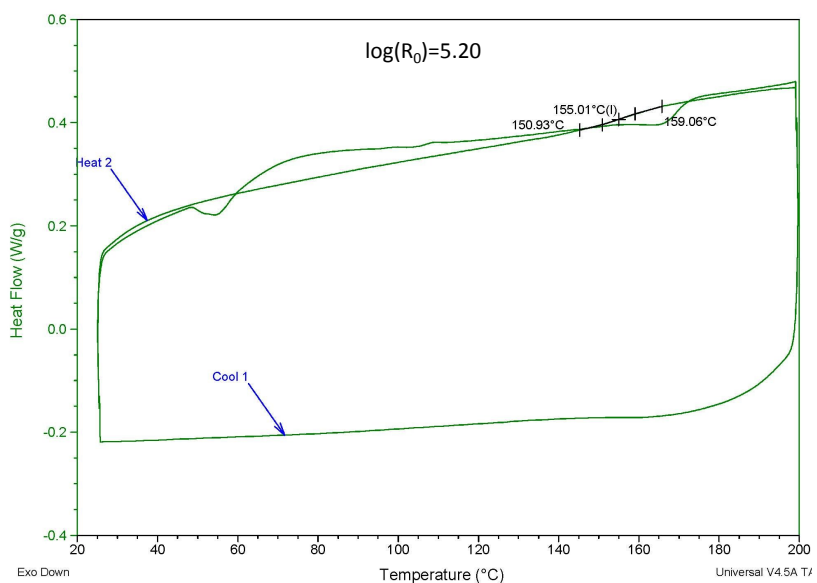

Figure S7. Represented DSC plots of GTP lignin.
